# Supplementary material for: Novel Dual-Color Immunochromatographic Assay Based on Chrysanthemum-like Au@polydopamine and Colloidal Gold for Simultaneous Sensitive Detection of Paclobutrazol and Carbofuran in Fruits and Vegetables
Source: MDPI journal article supplement (doi:10.3390/foods11111564), 2022-05-26
Supplement: s1 [file s1]

## *Supplementary information*

### **Novel dual-color immunochromatographic assay based on chrysanthemum-like Au@polydopamine and colloidal gold for simultaneous sensitive detection of paclobutrazol and carbofuran in fruits and vegetables**

Jiaqi Yin<sup>1</sup>, Yiyong Yan<sup>2</sup>, Kezhao Zhang<sup>1</sup>, Hui Fu<sup>2</sup>, Min Lu<sup>1</sup>, Hai Zhu<sup>2</sup>, Daixian Wei<sup>1</sup>, Juan Peng<sup>3</sup>, Weihua Lai<sup>\*1</sup>

<sup>1</sup> State Key Laboratory of Food Science and Technology, Nanchang University, Nanchang 330047, China; jiaqi412326@163.com (J.Y.); azhuo12290914@163.com (K.Z.); 13887429935@163.com (M.L.); 15395044739@163.com (D.W.)

<sup>2</sup> Shenzhen Bioeasy Biotechnology Co., Ltd., No. 2-1, Liuxian 1st Road, Baoan District, Shenzhen 518101, China; yanyy@bioeasy.com (Y.Y.); fuhui@bioeasy.com (H.F.); zhuhai@bioeasy.com (H.Z.)

<sup>3</sup> School of Food Science and Technology, Nanchang University, Nanchang 330047, China; pengjuan2016@163.com

\* Correspondence: talktolaiwh@163.com; Tel.: +86-138-7917-8802

## Synthesis of PBZ-hapten and CAR hapten

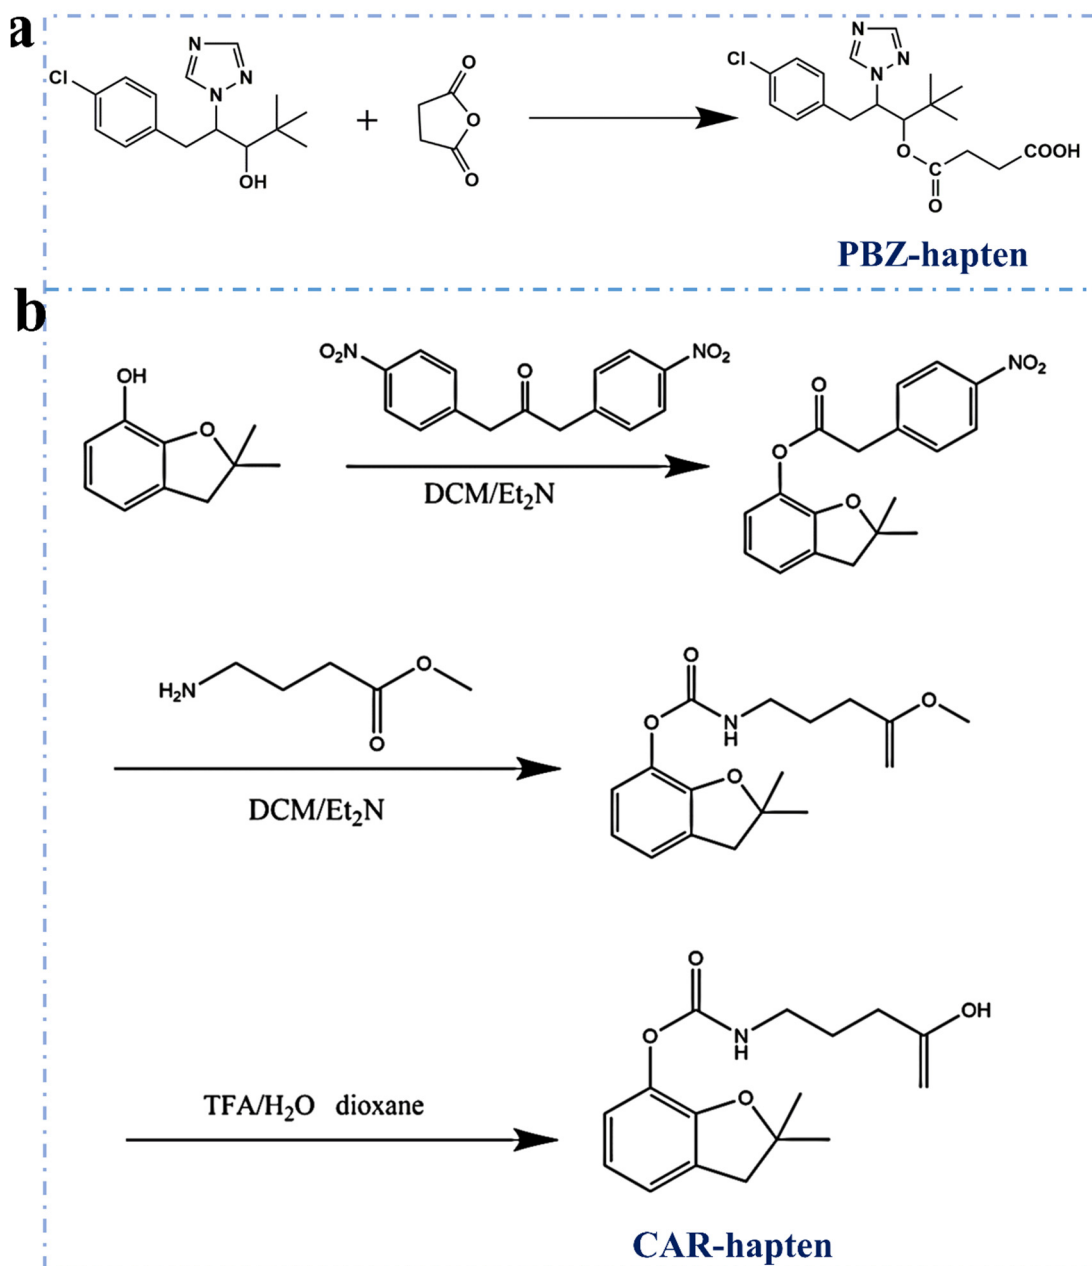

**Figure S1.** The synthesis route and chemical structure of (a) PBZ-hapten and (b) CAR-hapten.

## Synthesis of coating antigen and immunizing antigen

The immunizing antigen was obtained by coupling the hapten with bovine serum albumin (BSA) and the coating antigen was obtained by coupling the

hapten with OVA. 3.1 mg hapten was dissolved in 0.5 mL of DMF. Subsequently, 19 mg NHS, and 14 mg EDC were added. After the reaction at room temperature overnight, 3 mL of carbonate buffer solution (CBS, pH 9.6) containing 54.4 mg BSA or 36 mg OVA was added, and the mixture was stirred for 6 h to prepare the immunizing antigen and coating antigens. The reaction mixture was dialyzed in a phosphate buffer (PBS, pH 7.4) for 3 days.

### **ELISA method**

The mAb was evaluated with ic-ELISA methods. The coating antigens was added to 96-well microplate and incubated for 2 h. The microplate was washed thrice with phosphate buffer solution containing 0.05% tween-20 (PBST) and blocked with confining solution for 2 h. After washing, 50  $\mu$ L of PBZ standard solution and 50  $\mu$ L of mAb were added and allowed to react for 30 min. After washing, 100  $\mu$ L of HRP-conjugated goat anti-mouse antibody was added, and the mixture was allowed to react for 30 min. After adding 100  $\mu$ L of TMB solution for 15 min, 50  $\mu$ L of 2 M H<sub>2</sub>SO<sub>4</sub> was added to terminate the reaction. Finally, the optical density at 450 nm (OD<sub>450</sub>) was obtained by the microplate reader.

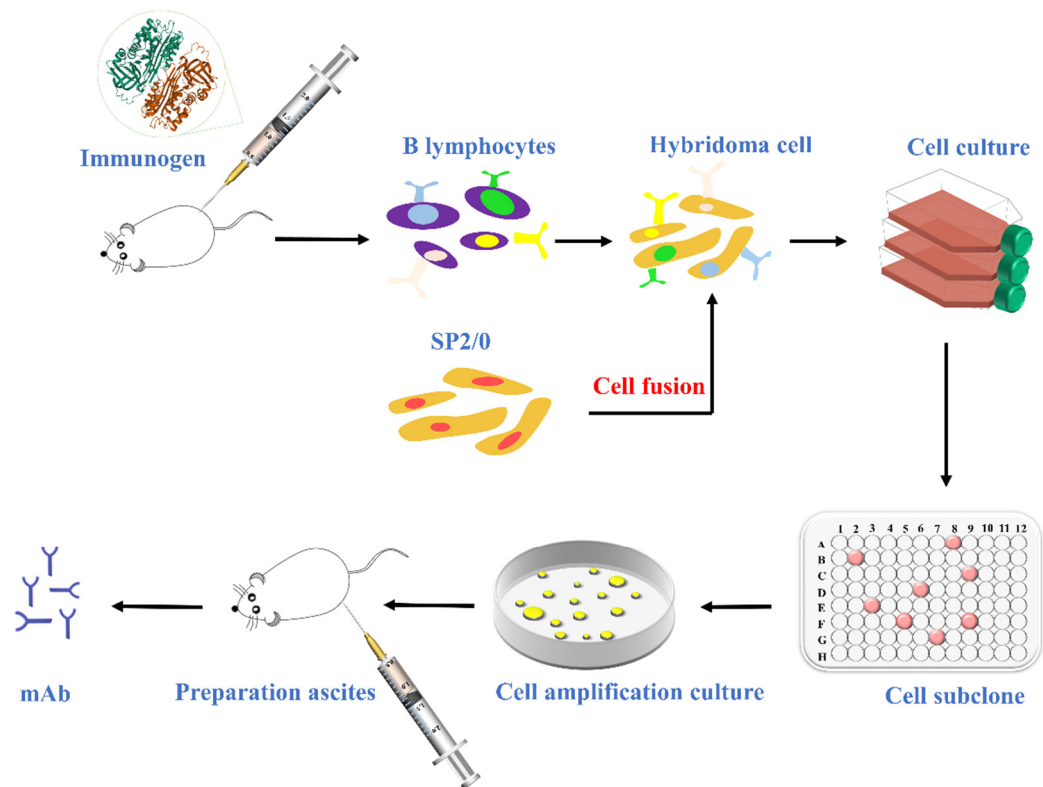

**Scheme S1.** Schematic illustration of the preparation of the mAb.

**Table S1.** Serum evaluation of mice after the fourth immunization.

| Immunogen | Number of mice | Hapten-OVA (PBZ-OVA/CAR-OVA) |                     |
|-----------|----------------|------------------------------|---------------------|
|           |                | OD <sub>450</sub>            | Inhibition rate (%) |
| PBZ-BSA   | 1              | 1.339                        | 53.58               |
|           | 2              | 1.228                        | 66.76               |
|           | 3              | 1.125                        | 67.96               |
|           | 4              | 1.539                        | 72.50               |
|           | 5              | 1.028                        | 72.10               |
|           | 6              | 0.998                        | 66.76               |
|           | 7              | 1.010                        | 57.93               |
|           | 8              | 1.382                        | 53.75               |
|           | 9              | 1.221                        | 61.28               |
|           | 10             | 0.997                        | 56.92               |
| CAR-BSA   | 1              | 1.610                        | 56.15               |
|           | 2              | 1.502                        | 62.63               |
|           | 3              | 1.621                        | 75.27               |
|           | 4              | 1.583                        | 63.45               |
|           | 5              | 1.614                        | 69.08               |
|           | 6              | 0.981                        | 54.76               |
|           | 7              | 1.483                        | 61.21               |
|           | 8              | 1.329                        | 59.29               |
|           | 9              | 1.133                        | 61.29               |
|           | 10             | 1.382                        | 56.48               |

**Table S2.** Antibody affinity assay data.

|     | Concentration of<br>coating antigens ( $\mu\text{g mL}^{-1}$ ) | Concentration of<br>antibody ( $\mu\text{g mL}^{-1}$ ) | Concentration of<br>antibody ( $\text{mol L}^{-1}$ ) |
|-----|----------------------------------------------------------------|--------------------------------------------------------|------------------------------------------------------|
| PBZ | 1                                                              | 0.0374                                                 | $2.49 \times 10^{-10}$                               |
|     | 0.3                                                            | 0.1158                                                 | $7.72 \times 10^{-10}$                               |
|     | 0.1                                                            | 0.2726                                                 | $1.81 \times 10^{-10}$                               |
| CAR | 1                                                              | 0.0242                                                 | $1.61 \times 10^{-10}$                               |
|     | 0.3                                                            | 0.0308                                                 | $2.05 \times 10^{-10}$                               |
|     | 0.1                                                            | 0.0570                                                 | $3.80 \times 10^{-10}$                               |

According to the affinity constant formula:  $K_a = (n-1) / 2 (n [Ab]_1 - [Ab]_2)$ . The PBZ-5F3 mAb affinity constants  $K_{a1}=5.02 \times 10^8$ ,  $K_{a2}=2.5 \times 10^8$ ,  $K_{a3}=2.14 \times 10^8 \text{ L mol}^{-1}$  were calculated when the coating concentration was 1 and  $0.3 \mu\text{g mL}^{-1}$ , 0.3 and  $0.1 \mu\text{g mL}^{-1}$ , 1 and  $0.1 \mu\text{g mL}^{-1}$ , respectively. The affinity constant  $K_a = (K_{a1} + K_{a2} + K_{a3})/3 = 3.22 \times 10^8 \text{ L mol}^{-1}$  of PBZ-5F3 mAb.

According to the affinity constant formula:  $K_a = (n-1) / 2 (n [Ab]_1 - [Ab]_2)$ . The CAR-3D1 mAb affinity constants  $K_{a1}=2.23 \times 10^9$ ,  $K_{a2}=1.24 \times 10^9$ ,  $K_{a3}=1.07 \times 10^9 \text{ L mol}^{-1}$  were calculated when the coating concentration was 1 and  $0.3 \mu\text{g mL}^{-1}$ , 0.3 and  $0.1 \mu\text{g mL}^{-1}$ , 1 and  $0.1 \mu\text{g mL}^{-1}$ , respectively. The affinity constant  $K_a = (K_{a1} + K_{a2} + K_{a3})/3 = 1.51 \times 10^9 \text{ L mol}^{-1}$  of CAR-3D1 mAb.

**Table S3.** Cross-reactivity result of PBZ-5F3 mAb to PBZ and analogues.

| Chemicals    | Structure                                                                           | IC <sub>50</sub> (ng mL <sup>-1</sup> ) | CR (%) |
|--------------|-------------------------------------------------------------------------------------|-----------------------------------------|--------|
| PBZ          | 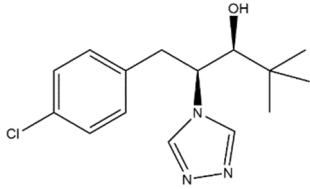   | 0.77                                    | 100    |
| Triadimenol  |    | >1000                                   | <0.01  |
| Uniconazole  |    | >1000                                   | <0.03  |
| Teuconazole  |  | >1000                                   | <0.01  |
| Hexaconazole |  | >1000                                   | <0.01  |
| Triadimefon  |  | >1000                                   | <0.02  |
| Tricyclazole |  | >1000                                   | <0.01  |

**Table S4.** Cross-reactivity result of CAR-3D1 mAb to CAR and analogues.

| Chemicals                | Structure                                                                           | IC <sub>50</sub> (ng mL <sup>-1</sup> ) | CR (%) |
|--------------------------|-------------------------------------------------------------------------------------|-----------------------------------------|--------|
| CAR                      | 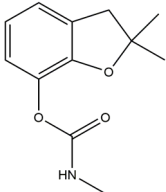   | 0.82                                    | 100    |
| Hydroxycobud-<br>-weiser |    | 27.34                                   | 2.99   |
| Carbosulfan              |    | 42.54                                   | 1.92   |
| Aldicarb                 |  | >1000                                   | <0.02  |
| Methomyl                 |  | >1000                                   | <0.01  |
| Tsumacide                |  | >1000                                   | <0.02  |
| Isoprocarb               |  | >1000                                   | <0.01  |



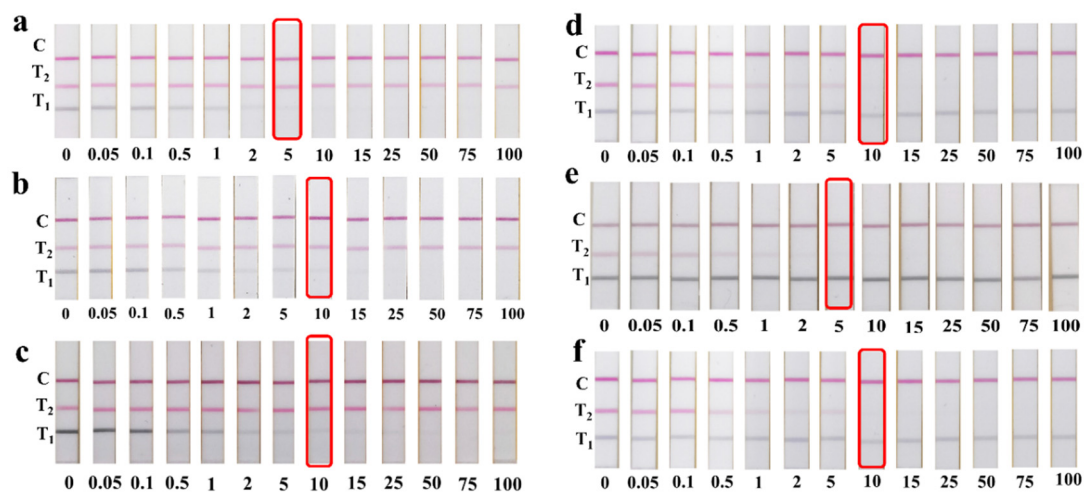

**Figure S2.** Image of test strips for the detection of PBZ and CAR based on dual color ICA. Detection of PBZ in orange (a), grape (b), and cabbage mustard (c). Detection of CAR in orange (d), grape (e), and cabbage mustard (f).

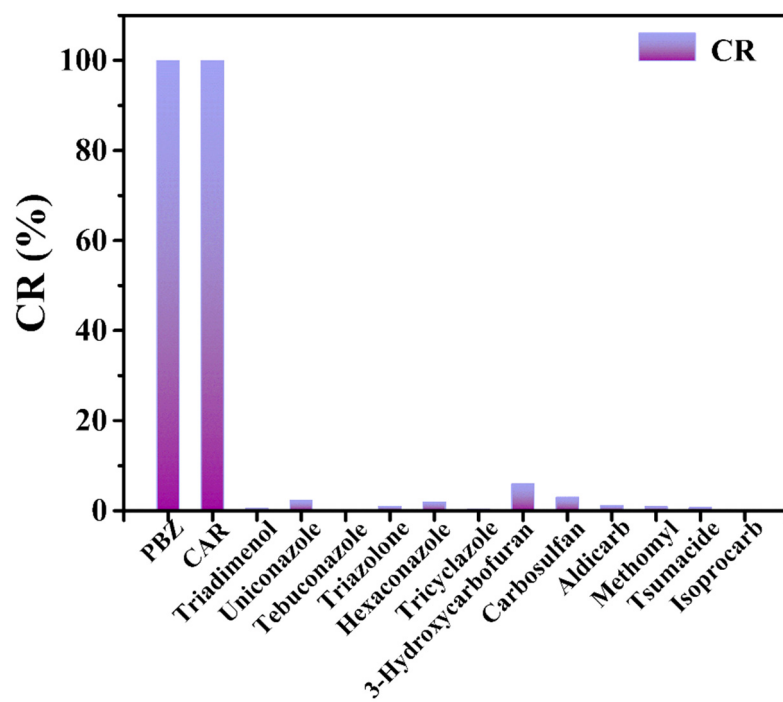

**Figure S3.** Specificity of dual color ICA with HPLC-MS/MS.

**Table S5.** The dual-color ICA and HPLC-MS/MS were used to detect PBZ and

| CAR in real samples |        |                 |            |            |            |
|---------------------|--------|-----------------|------------|------------|------------|
| Sample              | Number | dual-color ICA  |            | HPLC-MS/MS |            |
|                     |        | (µg/kg)         |            | (µg/kg)    |            |
|                     |        | PBZ             | CAR        | PBZ        | CAR        |
| oranges             | 1      | ND <sup>a</sup> | ND         | ND         | ND         |
|                     | 2      | ND              | 1.261±0.03 | ND         | 1.269±0.07 |
|                     | 3      | ND              | ND         | ND         | ND         |
|                     | 4      | 0.651±0.06      | ND         | 0.648±0.02 | ND         |
|                     | 5      | ND              | 0.395±0.05 | ND         | 0.402±0.06 |
|                     | 6      | 1.252±0.21      | ND         | 1.265±0.17 | ND         |
|                     | 7      | ND              | ND         | ND         | ND         |
|                     | 8      | ND              | 2.172±0.13 | ND         | 2.221±0.04 |
|                     | 9      | ND              | ND         | ND         | ND         |
|                     | 10     | ND              | ND         | ND         | ND         |
| grapes              | 1      | 0.213±0.04      | 0.259±0.07 | 0.221±0.02 | 0.261±0.04 |
|                     | 2      | ND              | ND         | ND         | ND         |
|                     | 3      | ND              | ND         | ND         | ND         |
|                     | 4      | ND              | ND         | ND         | ND         |
|                     | 5      | ND              | 0.938±0.04 | ND         | 0.951±0.03 |
|                     | 6      | 8.673±0.62      | ND         | 8.734±0.41 | ND         |
|                     | 7      | ND              | ND         | ND         | ND         |
|                     | 8      | ND              | 1.472±0.05 | ND         | 1.461±0.02 |
|                     | 9      | 2.613±0.67      | ND         | 2.561±0.54 | ND         |
|                     | 10     | ND              | ND         | ND         | ND         |
|                     | 1      | ND              | ND         | ND         | ND         |
|                     | 2      | 3.828±0.51      | 1.792±0.03 | 3.834±0.38 | 1.763±0.05 |
|                     | 3      | ND              | ND         | ND         | ND         |

|                    |    |            |            |            |            |
|--------------------|----|------------|------------|------------|------------|
| cabbage<br>mustard | 4  | ND         | ND         | ND         | ND         |
|                    | 5  | 0.769±0.07 | ND         | 0.774±0.04 | ND         |
|                    | 6  | ND         | ND         | ND         | ND         |
|                    | 7  | ND         | ND         | ND         | ND         |
|                    | 8  | ND         | 0.864±0.05 | ND         | 0.914±0.07 |
|                    | 9  | 2.163±0.41 | ND         | 2.158±0.22 | ND         |
|                    | 10 | ND         | ND         | ND         | ND         |

ND<sup>a</sup>: No detection
